# Supplementary material for: L-Arginine and Its Metabolites in Age-Related Cerebral Small Vessel Disease with Cognitive Impairment
Source: MDPI journal article supplement (doi:10.3390/biom16060914), 2026-06-19
Supplement: s1 [file biomolecules-4320042-supplementary.pdf › biomolecules-4320042-supplementary.pdf]

## Supplementary Appendix 1

**Table S1.** Associations between blood levels and derived ratios of L-arginine metabolism markers and fractional anisotropy (FA) among study participants.

| FA in ROIs                           | L-arginine | L-arginine/<br>L-ornithine + L-<br>citrulline | L-arginine/<br>L-ornithine | L-arginine/<br>L-citrulline |
|--------------------------------------|------------|-----------------------------------------------|----------------------------|-----------------------------|
| <i>Frontal lobe, posterior parts</i> |            |                                               |                            |                             |
| jNAWM                                | -0.369     | -0.339                                        | -0.326                     | -0.320                      |
| pNAWM                                | n.s.       | n.s.                                          | n.s.                       | -0.333                      |
| jWMH                                 | n.s.       | n.s.                                          | n.s.                       | -0.442                      |
| <i>Tempo-parietal lobe</i>           |            |                                               |                            |                             |
| jNAWM                                | n.s.       | -0.331                                        | -0.304                     | -0.313                      |
| <i>Cingulate gyrus, right</i>        |            |                                               |                            |                             |
| middle parts                         | -0.418     | -0.366                                        | -0.338                     | -0.312                      |
| <i>Corpus callosum</i>               |            |                                               |                            |                             |
| anterior parts                       | n.s.       | n.s.                                          | n.s.                       | -0.365                      |
| anterior-middle parts                | n.s.       | -0.393                                        | -0.306                     | -0.313                      |
| <i>Hippocampus</i>                   |            |                                               |                            |                             |
| right                                | n.s.       | n.s.                                          | -0.315                     | n.s.                        |

**Note.** Values represent Spearman's rank correlation coefficients ( $r_s$ ); n.s. — non significant.

FA, fractional anisotropy ( $\times 10^{-2}$ ); jNAWM, juxtacortical normal-appearing white matter; dNAWM, deep normal-appearing white matter; pNAWM, periventricular normal-appearing white matter; jWMH, juxtacortical white matter hyperintensity; ROIs, regions of interest.

**Table S2.** Associations between blood levels and derived ratios of L-arginine metabolism markers and mean diffusivity (MD) values among study participants.

| MD in ROIs                           | L-arginine | L-arginine/<br>L-ornithine +<br>L-citrulline | L-arginine/<br>L-ornithine | L-arginine/<br>L-citrulline | L-arginine/<br>ADMA |
|--------------------------------------|------------|----------------------------------------------|----------------------------|-----------------------------|---------------------|
| <i>Frontal lobe, anterior parts</i>  |            |                                              |                            |                             |                     |
| jNAWM                                | n.s.       | 0.319                                        | n.s.                       | n.s.                        | n.s.                |
| dNAWM                                | 0.298      | 0.365                                        | n.s.                       | 0.434                       | n.s.                |
| pWMH                                 | 0.405      | 0.436                                        | 0.345                      | 0.386                       | n.s.                |
| dWMH                                 | 0.423      | n.s.                                         | n.s.                       | n.s.                        | n.s.                |
| <i>Frontal lobe, posterior parts</i> |            |                                              |                            |                             |                     |
| dNAWM                                | n.s.       | 0.449                                        | 0.325                      | n.s.                        | n.s.                |
| pWMH                                 | 0.366      | n.s.                                         | n.s.                       | n.s.                        | n.s.                |
| dWMH                                 | 0.410      | 0.358                                        | 0.368                      | n.s.                        | n.s.                |
| <i>Tempo-parietal lobe</i>           |            |                                              |                            |                             |                     |
| jNAWM                                | 0.366      | 0.359                                        | n.s.                       | 0.318                       | n.s.                |
| jWMH                                 | n.s.       | 0.382                                        | n.s.                       | n.s.                        | n.s.                |
| pWMH                                 | 0.435      | 0.527                                        | 0.518                      | 0.340                       | n.s.                |
| dWMH                                 | 0.374      | 0.452                                        | 0.405                      | n.s.                        | 0.310               |
| <i>Cingulate gyrus, left</i>         |            |                                              |                            |                             |                     |

|                        |       |       |       |       |       |
|------------------------|-------|-------|-------|-------|-------|
| anterior parts         | n.s.  | 0.319 | n.s.  | 0.340 | n.s.  |
| middle parts           | 0.448 | 0.456 | 0.355 | 0.357 | 0.319 |
| <i>Corpus callosum</i> |       |       |       |       |       |
| anterior-middle parts  | n.s.  | 0.316 | n.s.  | n.s.  | n.s.  |

**Note.** Values represent Spearman's rank correlation coefficients ( $r_s$ ); n.s. — non significant.

MD, mean diffusivity ( $\text{mm}^2/\text{s} \times 10^{-4}$ ); jNAWM, juxtacortical normal-appearing white matter; dNAWM, deep normal-appearing white matter; pNAWM, periventricular normal-appearing white matter; jWMH, juxtacortical white matter hyperintensity; dWMH, deep white matter hyperintensity; pWMH, periventricular white matter hyperintensity; ROIs, regions of interest.

**Table S3.** Associations between blood levels and derived ratios of L-arginine metabolism markers and radial diffusivity (RD) values among study participants.

| RD in ROIs                           | L-arginine | L-arginine/<br>L-ornithine + L-<br>citrulline | L-arginine/<br>L-ornithine | L-arginine/<br>L-citrulline | L-arginine/<br>ADMA |
|--------------------------------------|------------|-----------------------------------------------|----------------------------|-----------------------------|---------------------|
| <i>Frontal lobe, anterior parts</i>  |            |                                               |                            |                             |                     |
| jNAWM                                | n.s.       | 0.335                                         | n.s.                       | 0.340                       | n.s.                |
| dNAWM                                | n.s.       | 0.354                                         | n.s.                       | 0.448                       | n.s.                |
| jWMH                                 | 0.390      | n.s.                                          | n.s.                       | n.s.                        | n.s.                |
| pWMH                                 | 0.390      | 0.410                                         | 0.337                      | n.s.                        | n.s.                |
| dWMH                                 | 0.420      | n.s.                                          | n.s.                       | n.s.                        | 0.344               |
| <i>Frontal lobe, posterior parts</i> |            |                                               |                            |                             |                     |
| jNAWM                                | 0.351      | 0.320                                         | 0.311                      | n.s.                        | n.s.                |
| pWMH                                 | 0.371      | n.s.                                          | n.s.                       | n.s.                        | n.s.                |
| dWMH                                 | 0.392      | 0.335                                         | 0.359                      | n.s.                        | n.s.                |
| <i>Tempo-parietal lobe</i>           |            |                                               |                            |                             |                     |
| jNAWM                                | 0.300      | 0.480                                         | 0.366                      | 0.421                       | n.s.                |
| jWMH                                 | n.s.       | 0.395                                         | n.s.                       | n.s.                        | n.s.                |
| pWMH                                 | 0.417      | 0.523                                         | 0.508                      | 0.351                       | n.s.                |
| dWMH                                 | 0.455      | 0.531                                         | 0.471                      | 0.331                       | 0.342               |
| <i>Cingulate gyrus, right</i>        |            |                                               |                            |                             |                     |
| middle parts                         | 0.402      | 0.336                                         | 0.324                      | 0.301                       | n.s.                |
| posterior parts                      | 0.322      | 0.348                                         | 0.390                      | n.s.                        | n.s.                |
| <i>Cingulate gyrus, left</i>         |            |                                               |                            |                             |                     |
| middle parts                         | n.s.       | 0.372                                         | n.s.                       | n.s.                        | n.s.                |
| <i>Corpus callosum</i>               |            |                                               |                            |                             |                     |
| anterior-middle parts                | n.s.       | 0.369                                         | 0.300                      | n.s.                        | n.s.                |

**Note.** Values represent Spearman's rank correlation coefficients ( $r_s$ ); n.s. — non significant

RD, radial diffusivity ( $\text{mm}^2/\text{s} \times 10^{-4}$ ); jNAWM, juxtacortical normal-appearing white matter; dNAWM, deep normal-appearing white matter; pNAWM, periventricular normal-appearing white matter; jWMH, juxtacortical white matter hyperintensity; dWMH, deep white matter hyperintensity; pWMH, periventricular white matter hyperintensity; ROIs, regions of interest.

**Table S4.** Associations between blood levels and derived ratios of L-arginine metabolism markers and axial diffusivity (AD) values among study participants.

| AD in ROIs                           | L-arginine | L-arginine/<br>L-ornithine + L-citrulline | L-arginine/<br>L-ornithine | L-arginine/<br>L-citrulline |
|--------------------------------------|------------|-------------------------------------------|----------------------------|-----------------------------|
| <i>Frontal lobe, posterior parts</i> |            |                                           |                            |                             |
| dNAWM                                | 0.358      | 0.502                                     | 0.349                      | 0.541                       |
| <i>Corpus callosum</i>               |            |                                           |                            |                             |
| posterior-middle parts               | 0.324      | n.s.                                      | n.s.                       | n.s.                        |
| <i>Uncinate fasciculus</i>           |            |                                           |                            |                             |
| left                                 | 0.324      | 0.346                                     | n.s                        | 0.335                       |

**Note.** Values represent Spearman's rank correlation coefficients ( $r_s$ ); n.s. — non significant

AD, axial diffusivity ( $\text{mm}^2/\text{s} \times 10^{-4}$ ); dNAWM, deep normal-appearing white matter; ROIs, regions of interest.
